# Supplementary material
Source: MDPI journal article supplement (https://www.mdpi.com/2673-7248/3/2/14)
Supplement: s1 [file s1 › textiles-2362001-supplementary.pdf]

| Source                       | LogWorth |                                                                                     | PValue  |
|------------------------------|----------|-------------------------------------------------------------------------------------|---------|
| Surfactants                  | 11.923   | 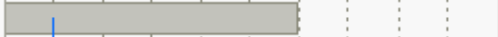 | 0.00000 |
| Temperature(40,65)           | 7.705    | 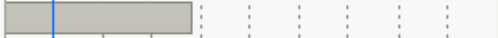 | 0.00000 |
| Surfactants*Temperature      | 7.419    | 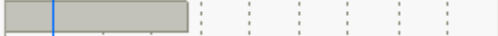 | 0.00000 |
| Temperature*Time             | 4.276    | 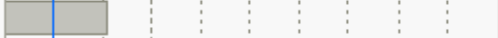 | 0.00005 |
| Time(15,60)                  | 2.949    | 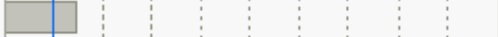 | 0.00113 |
| Surfactants*Time             | 2.654    | 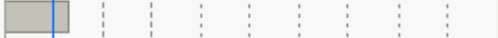 | 0.00222 |
| Surfactants*Temperature*Time | 2.555    | 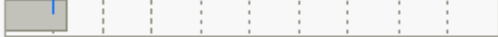 | 0.00279 |

Figure S1: Effect summary for PAHs (bench-scale)

| Source                       | LogWorth |                                                                                      | PValue  |
|------------------------------|----------|--------------------------------------------------------------------------------------|---------|
| Temperature(40,65)           | 5.694    | 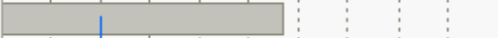  | 0.00000 |
| Temperature*Time             | 4.897    | 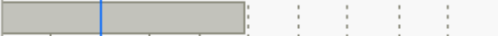  | 0.00001 |
| Surfactants                  | 4.190    | 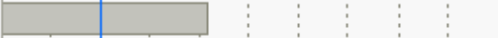  | 0.00006 |
| Surfactants*Temperature      | 3.490    | 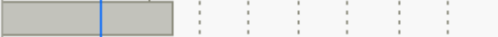  | 0.00032 |
| Surfactants*Temperature*Time | 2.626    | 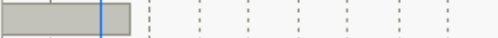  | 0.00237 |
| Surfactants*Time             | 0.722    | 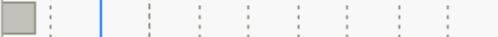  | 0.18964 |
| Time(15,60)                  | 0.348    | 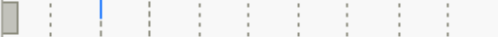 | 0.44924 |

Figure S2: Effect summary of phthalates (bench-scale)

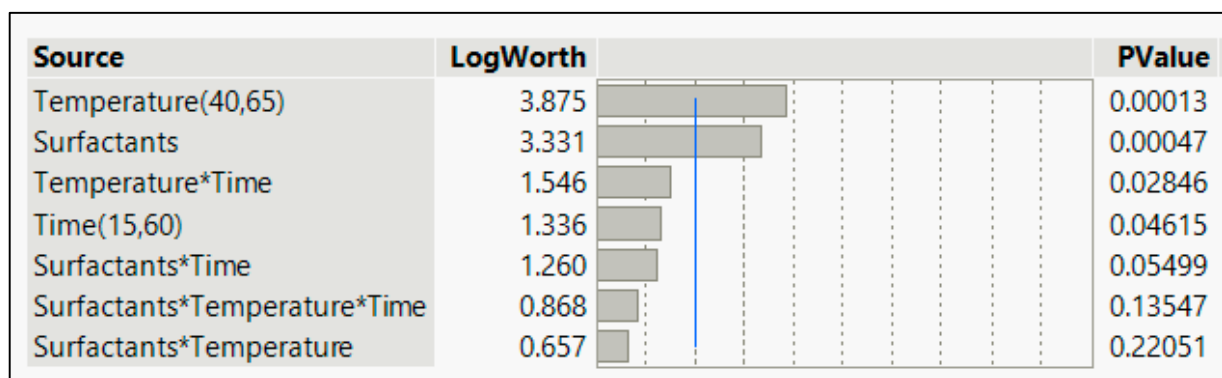

Figure S3: Effect summary for phenols (bench-scale)

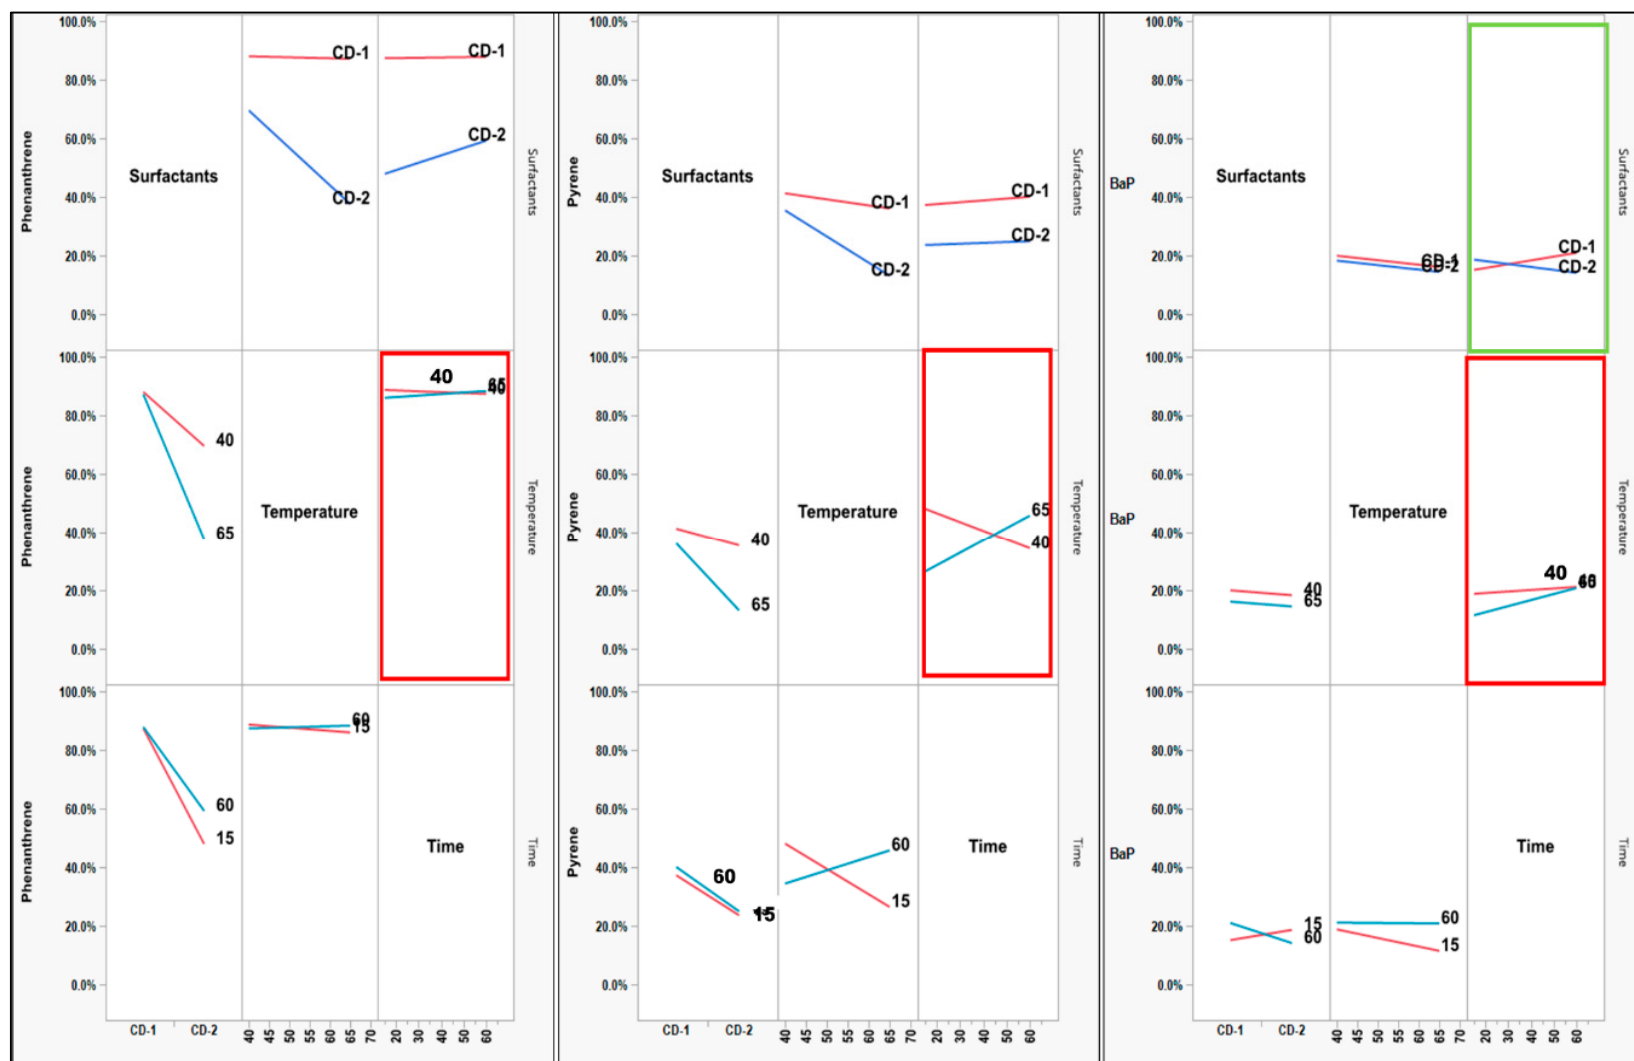

Figure S4: Interaction plots for PAHs (Bench-scale)

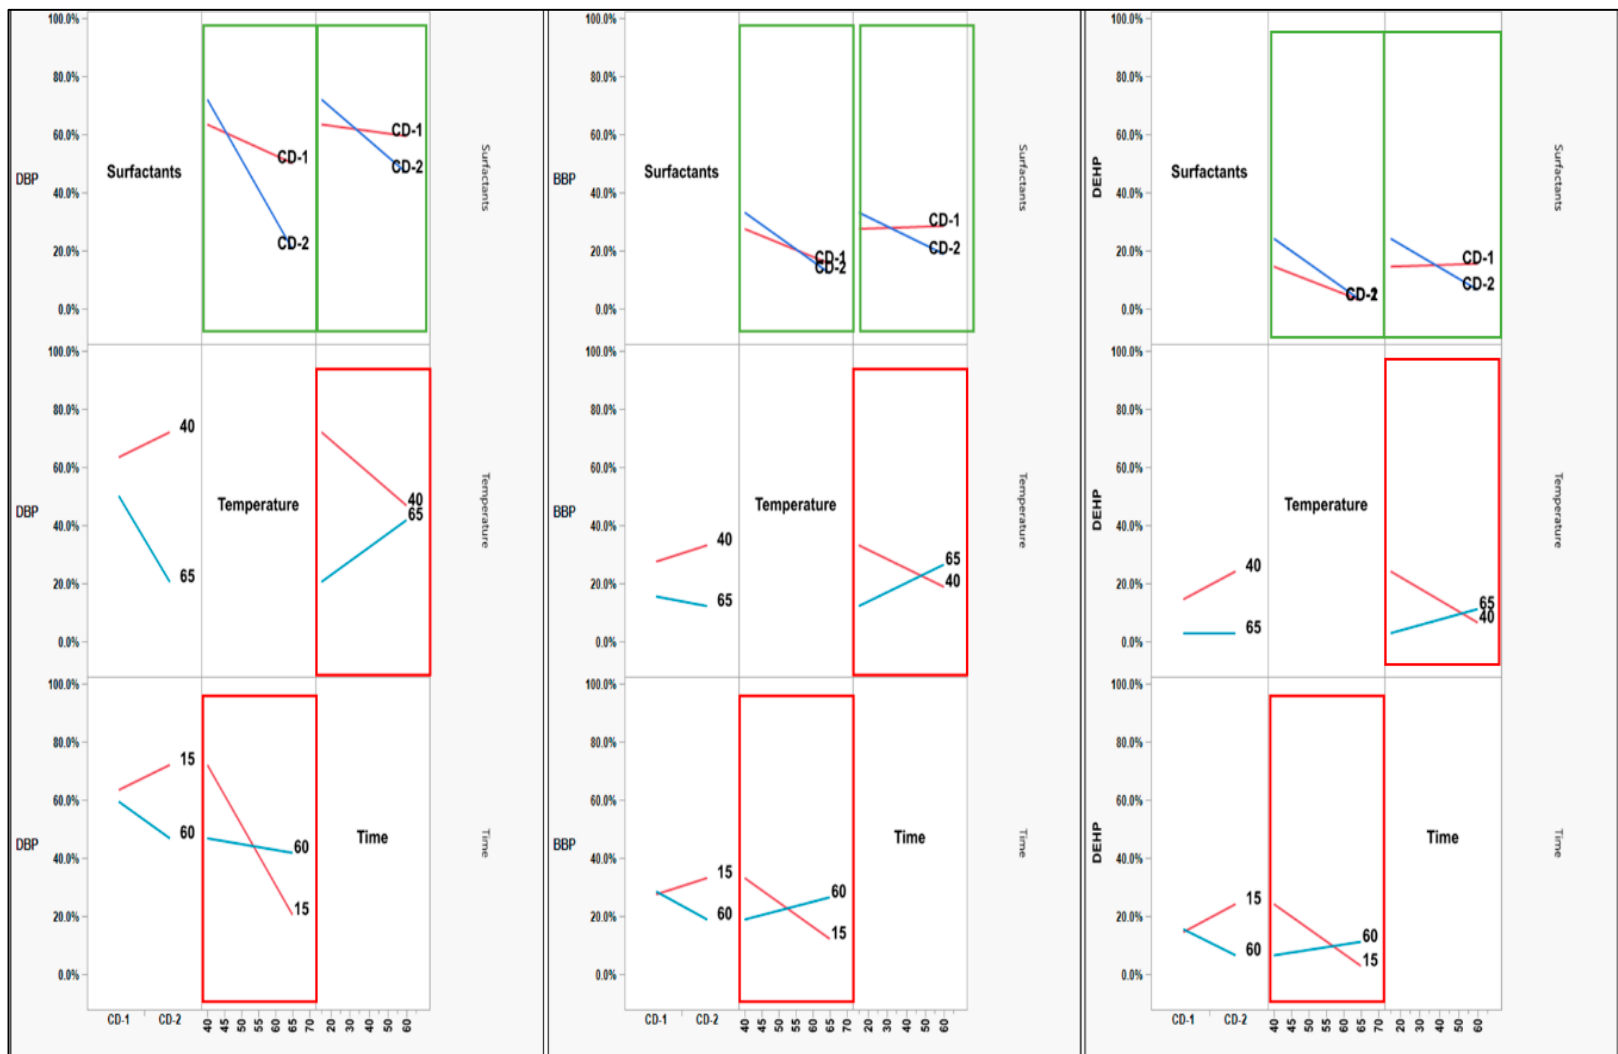

Figure S5: Interaction plots for phthalates (Bench-scale)

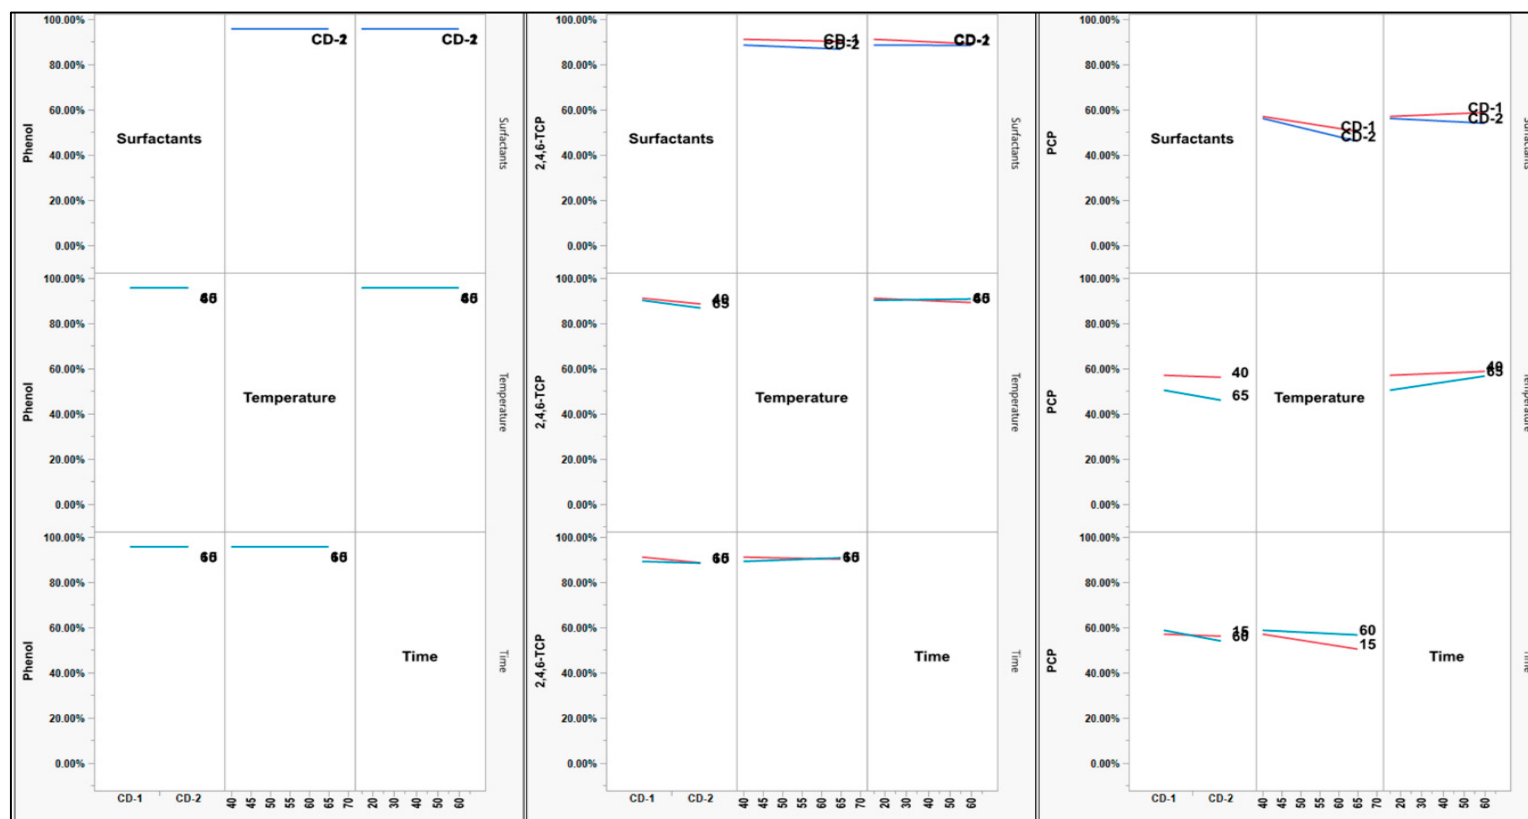

Figure S6: Interaction plots for phenols (Bench-scale)

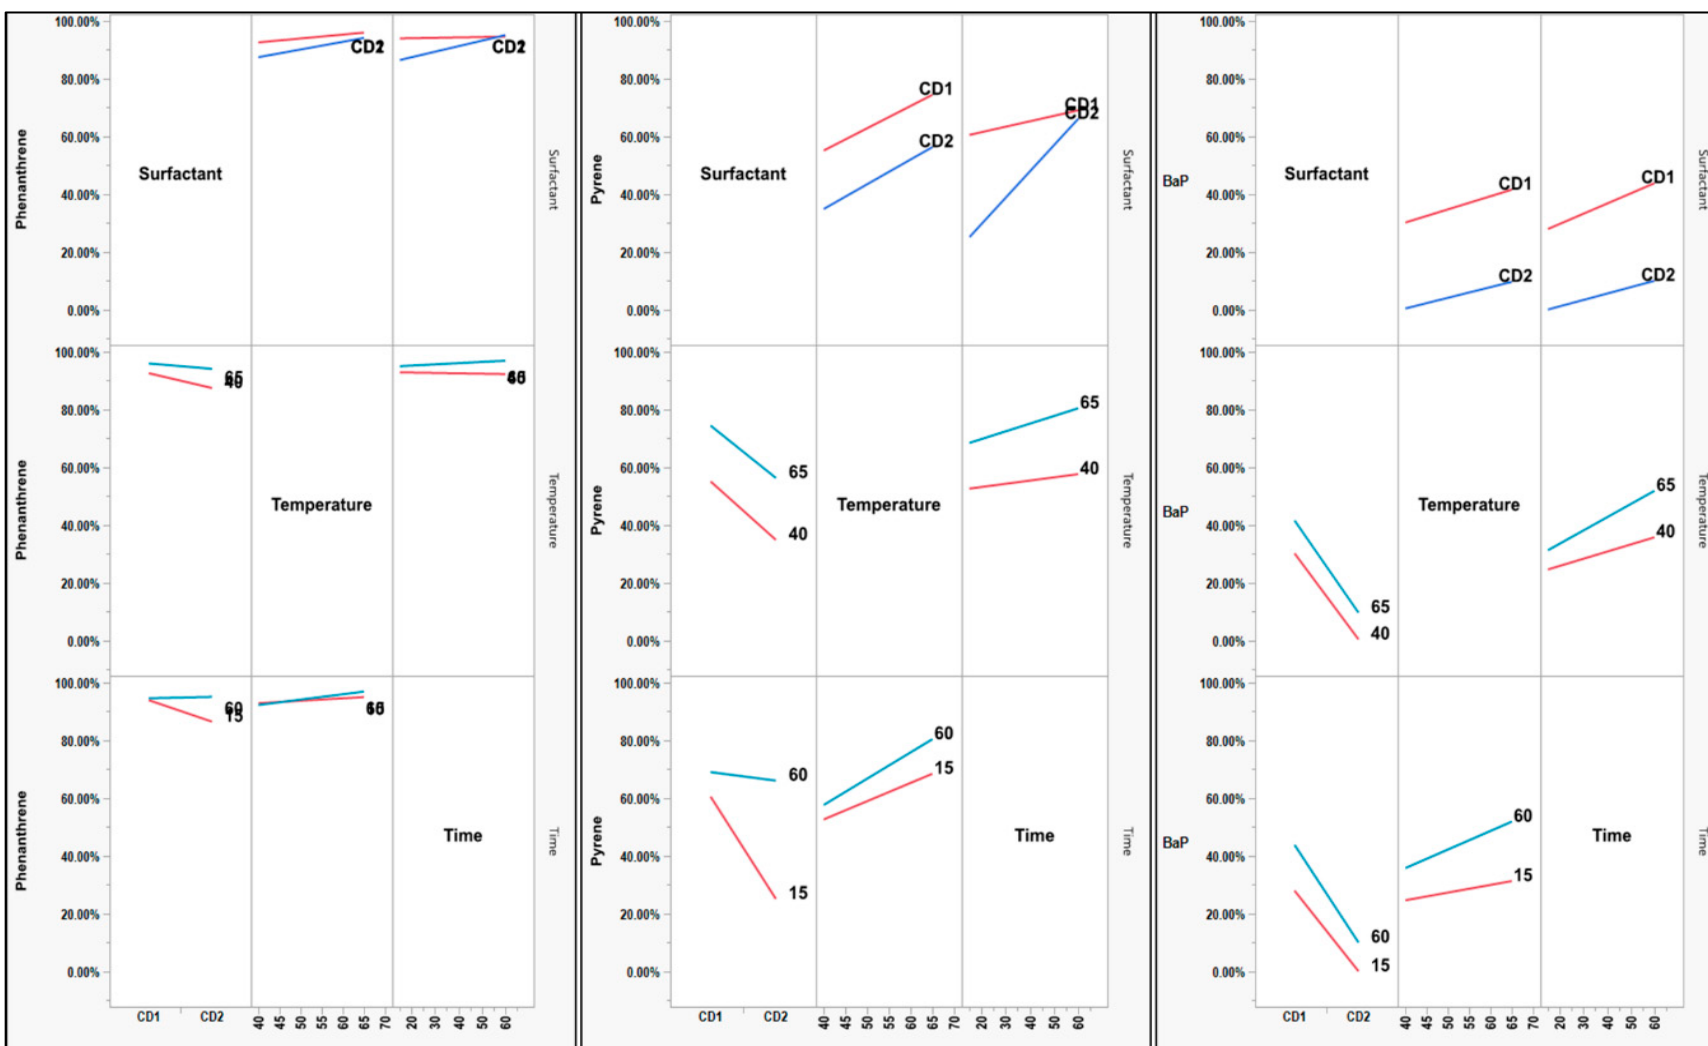

Figure S7: Interaction plots for PAHs (Full-scale)

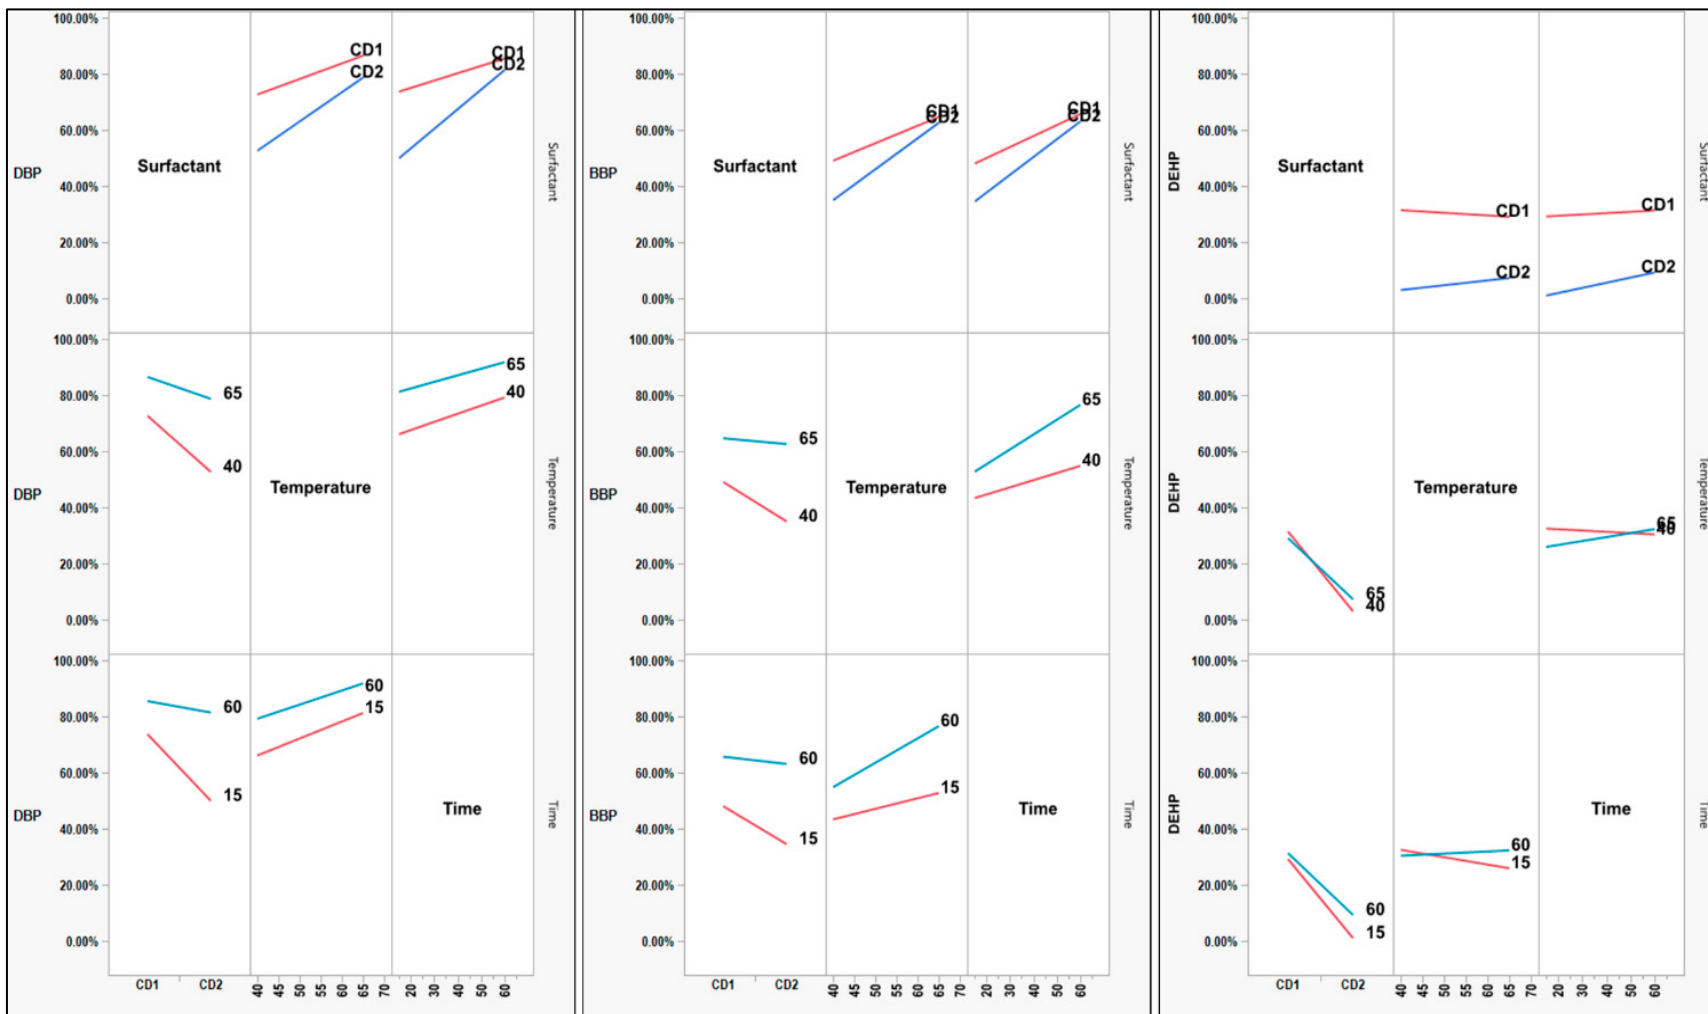

Figure S8: Interaction plots for phthalates (Full-scale)

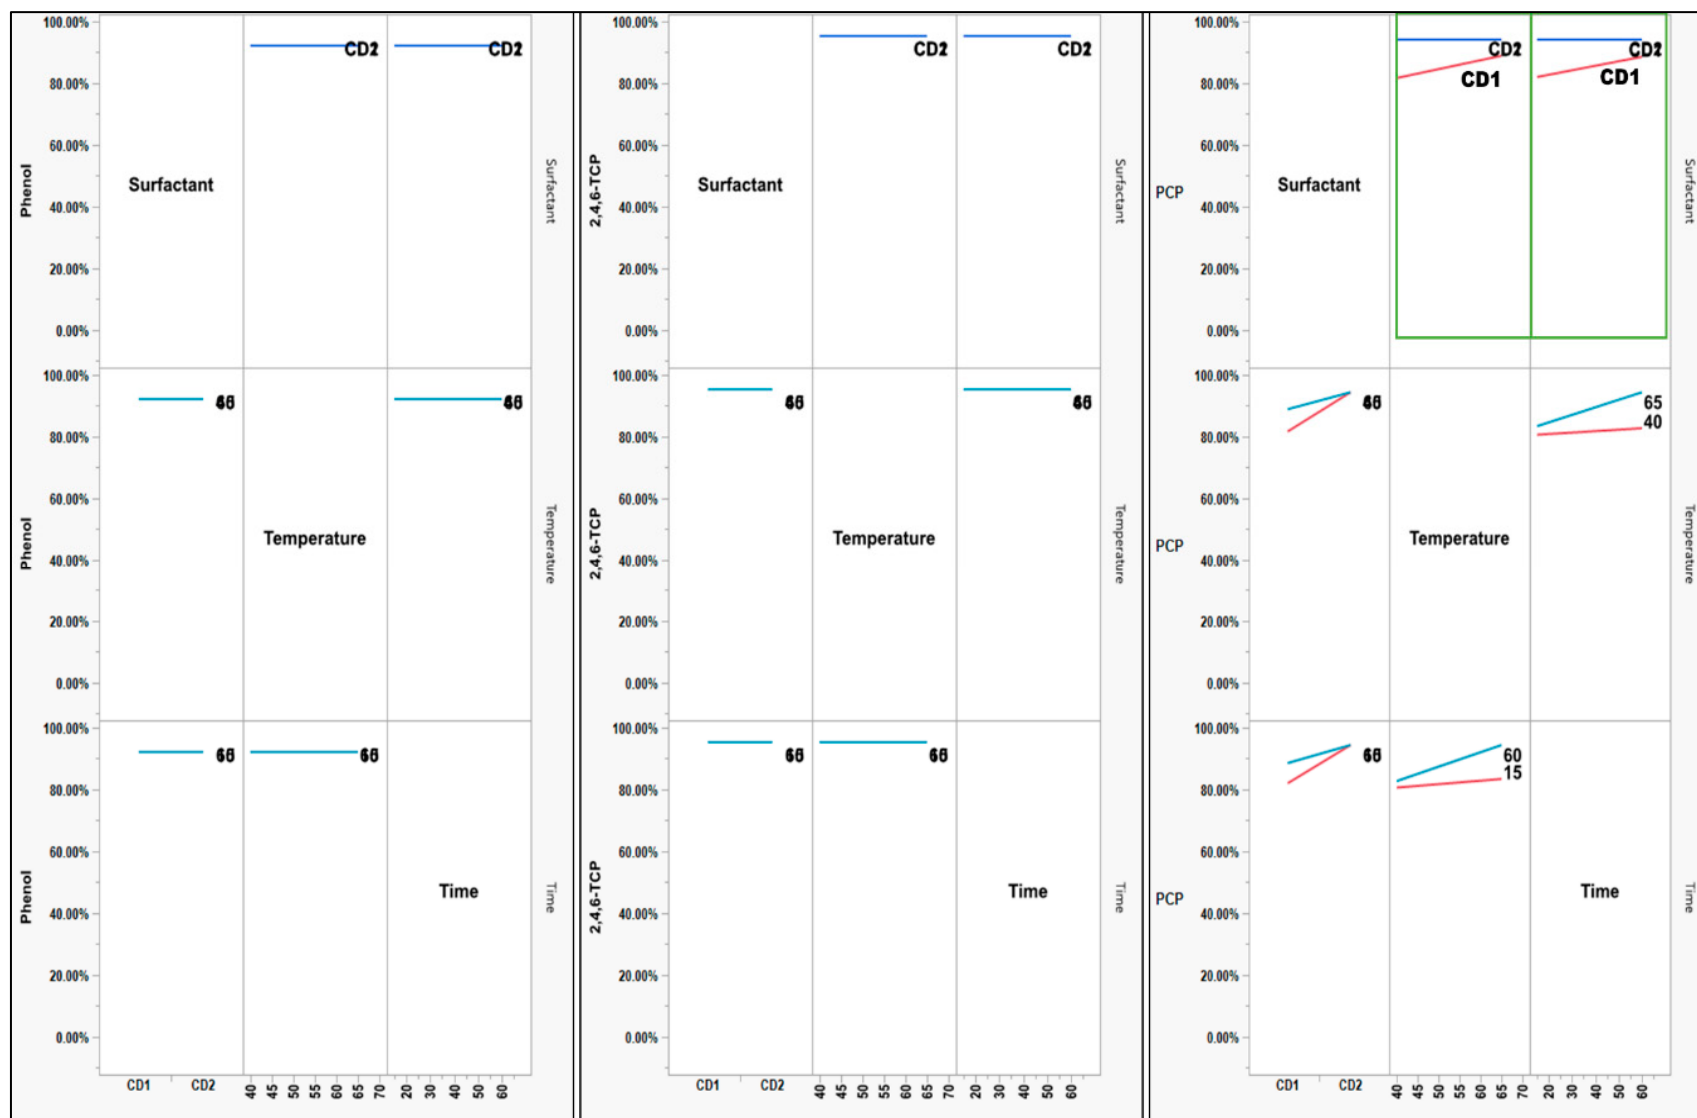

Figure S9: Interaction plots for phenols (Full-scale)
